# Supplementary material
Source: PubMed Central journal article supplement (PMC6990681)
Supplement: jamainternmed-180-402-s001.pdf [file jamainternmed-180-402-s001.pdf]

## Supplementary Online Content

Hsu C-y, Chinchilli VM, Coca S, et al. Post—acute kidney injury proteinuria and subsequent kidney disease progression: the Assessment, Serial Evaluation, and Subsequent Sequelae in Acute Kidney Injury (ASSESS-AKI) study. *JAMA Intern Med.* Published online January 27, 2020. doi:10.1001/jamainternmed.2019.6390

**eFigure.** Assembly of matched cohort adults with and without acute kidney injury

**eTable 1.** ASSESS-AKI enrollees follow-up through November 30, 2019 (N=1538)

**eTable 2.** Incremental improvement in model performance with addition of urine

**eTable 3.** Results of sensitivity analyses

**eTable 4.** Urine PCR, AKI stage and risk of kidney disease progression among those with AKI (N=769) and among those without AKI (N=769)

**eTable 5.** Urine PCR, AKI/stage of AKI and risk of kidney disease progression among all ASSESS-AKI adult match cohort study participants (N=1538)

**eTable 6.** Kidney Failure Risk Equation (KFRE) score, AKI/stages of AKI and risk ESRD

This supplementary material has been provided by the authors to give readers additional information about their work.

## SUPPLEMENTARY FIGURE

**Supplementary Figure S1. Assembly of matched cohort of adults with and without acute kidney injury.**

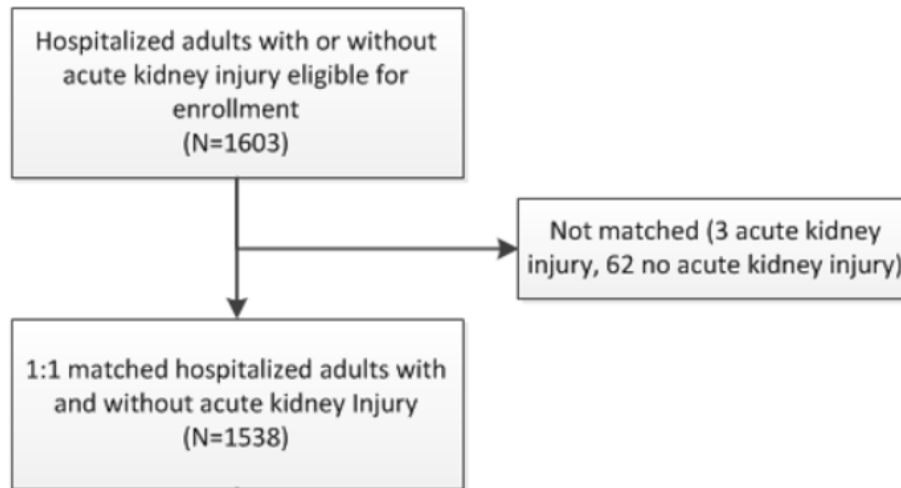

## SUPPLEMENTARY TABLE

**Supplementary Table 1. ASSESS-AKI enrollees follow-up through November 30, 2019 (N=1538)**

| Death                                         | ESRD w/o death                                 | Withdrew/lost to follow-up                                                                                                                                      | Remaining (through November 30, 2018) |
|-----------------------------------------------|------------------------------------------------|-----------------------------------------------------------------------------------------------------------------------------------------------------------------|---------------------------------------|
| 320<br>(including 33 deaths after ESRD onset) | 25<br>(so total number of ESRD was 58 [25+33]) | 189<br>(reasons included: no longer willing to follow the protocol/<br>interested in participating; lost to follow-up; participant has<br>personal constraints) | 1004                                  |

**Supplementary Table 2. Incremental improvement in model performance with addition of urine ACR**

|                                                             |                                                                                                                                                                                                                                                                                                 | C-statistic | Change in C-statistics | Net Reclassification Improvement (NRI) |
|-------------------------------------------------------------|-------------------------------------------------------------------------------------------------------------------------------------------------------------------------------------------------------------------------------------------------------------------------------------------------|-------------|------------------------|----------------------------------------|
| Base model without urine ACR<br><i>(with stages of AKI)</i> | Female vs Male<br>Black vs Non-Black<br>Hispanic vs Non-Hispanic<br>Diabetic vs Non-Diabetic<br>Older Age (per 5 yr increase)<br>Higher Systolic BP (per 10 mmHg increase)<br>Higher BMI (per 5 kg/m <sup>2</sup> increase)<br>Lower eGFR<br>Stage 2 vs. stage 1 AKI<br>Stage 3 vs. stage 1 AKI | 0.818       |                        |                                        |
|                                                             | Adjusted model above + urine ACR                                                                                                                                                                                                                                                                | 0.850       | 0.032 (p <0.0001)      | 0.555 (p <0.0001)                      |

**Supplementary Table 3. Results of sensitivity analyses.**

|                                      |                                         | <i>Original Table 2 results:</i><br>Original ASSESS-AKI study AKI enrollees (N=769) |             | <i>Sensitivity analysis:</i><br>AKI enrollees meeting met the 50% higher serum Cr criteria (N=468) |             | <i>Sensitivity analysis:</i><br>requiring that the halving of eGFR be confirmed on two consecutive values (N=769) |             | <i>Sensitivity analysis:</i><br>Additionally adjusting for smoking and ACE-I/ARB use (N=769) |             | <i>Sensitivity analysis:</i><br>Additionally adjusting for change in eGFR from pre-AKI to post-AKI (N=769) |             | <i>Sensitivity analysis:</i><br>Fine-Gray model results (N=769) |             |
|--------------------------------------|-----------------------------------------|-------------------------------------------------------------------------------------|-------------|----------------------------------------------------------------------------------------------------|-------------|-------------------------------------------------------------------------------------------------------------------|-------------|----------------------------------------------------------------------------------------------|-------------|------------------------------------------------------------------------------------------------------------|-------------|-----------------------------------------------------------------|-------------|
|                                      |                                         | HR*                                                                                 | C-statistic | HR*                                                                                                | C-statistic | HR*                                                                                                               | C-statistic | HR*                                                                                          | C-statistic | HR*                                                                                                        | C-statistic | HR*                                                             | C-statistic |
| Unadjusted models                    | Higher urine ACR (mg/gm) (per doubling) | 1.53<br>(1.43-1.64)                                                                 | 0.823       | 1.45<br>(1.33-1.58)                                                                                | 0.805       | 1.87<br>(1.68-2.08)                                                                                               | 0.913       | NA                                                                                           | NA          | NA                                                                                                         | NA          | 1.47<br>(1.35-1.60)                                             | 0.823       |
| Adjusted models                      |                                         | 1.37<br>(1.26-1.49)                                                                 | 0.846       | 1.34<br>(1.20-1.50)                                                                                | 0.839       | 1.69<br>(1.46-1.96)                                                                                               | 0.931       | 1.41<br>(1.28-1.54)                                                                          | 0.844       | 1.36<br>(1.25-1.49)                                                                                        | 0.851       | 1.33<br>(1.19-1.48)                                             | 0.845       |
| Adjusted models (with stages of AKI) |                                         | 1.38<br>(1.26- 1.50)                                                                | 0.850       | 1.35<br>(1.20-1.52)                                                                                | 0.845       | 1.70<br>(1.46-1.98)                                                                                               | 0.934       | 1.42<br>(1.29-1.59)                                                                          | 0.848       | 1.37<br>(1.25-1.49)                                                                                        | 0.859       | 1.33<br>(1.20-1.49)                                             | 0.849       |

\*all associated p-values <0.0001

**Supplementary Table 4. Urine PCR, AKI stage and risk of kidney disease progression among those with AKI (N=769) and among those without AKI (N=769)**

|                                                        | Predictor(s) in model                                  | ASSESS-AKI enrollees <u>with</u> recent history of AKI prior to baseline visit (N=769) |                   |                   | ASSESS-AKI enrollees <u>without</u> recent history of AKI prior to baseline visit (N=769) |         |             |  |
|--------------------------------------------------------|--------------------------------------------------------|----------------------------------------------------------------------------------------|-------------------|-------------------|-------------------------------------------------------------------------------------------|---------|-------------|--|
|                                                        |                                                        | HR                                                                                     | P-value           | C-statistic       | HR                                                                                        | P-value | C-statistic |  |
| Unadjusted models                                      | Higher urine PCR (g/g)(per doubling)                   | 1.98 (1.80-2.18)                                                                       | <0.0001           | 0.822             | 1.82 (1.62-2.04)                                                                          | <0.0001 | 0.788       |  |
|                                                        | Lower eGFR (per 10 ml/min/1.73m <sup>2</sup> decrease) | 1.50 (1.36-1.66)                                                                       | <0.0001           | 0.767             | 1.42 (1.22-1.66)                                                                          | <0.0001 | 0.708       |  |
|                                                        | Stage 2 vs. stage 1 AKI<br>Stage 3 vs. stage 1 AKI     | 0.86 (0.45-1.63)<br>1.59 (0.93-2.72)                                                   | 0.64<br>0.09      | 0.263             | N/A                                                                                       |         |             |  |
| Adjusted models                                        | Higher urine PCR (g/g)(per doubling)                   | 1.75 (1.55-1.97)                                                                       | < 0.0001          | 0.853             | 1.82 (1.51- 2.19)                                                                         | <0.0001 | 0.831       |  |
|                                                        | Female vs Male                                         | 1.25 (0.81-1.94)                                                                       | 0.31              |                   | 1.28 (0.64-2.54)                                                                          | 0.49    |             |  |
|                                                        | Black vs Non-Black                                     | 0.97 (0.57-1.63)                                                                       | 0.89              | 2.10 (0.92-4.82)  | 0.08                                                                                      |         |             |  |
|                                                        | Hispanic vs Non-Hispanic                               | 0.71 (0.22-2.35)                                                                       | 0.58              | 1.55 (0.20-11.87) | 0.67                                                                                      |         |             |  |
|                                                        | Diabetic vs Non-Diabetic                               | 1.68 (0.98-2.88)                                                                       | 0.06              | 1.75 (0.86-3.54)  | 0.12                                                                                      |         |             |  |
|                                                        | Older Age (per 5 yr increase)                          | 0.91 (0.83-1.01)                                                                       | 0.09              | 0.84 (0.71-0.99)  | 0.04                                                                                      |         |             |  |
|                                                        | Higher Systolic BP (per 10 mmHg increase)              | 1.01 (0.92-1.11)                                                                       | 0.82              | 1.04 (0.88-1.23)  | 0.62                                                                                      |         |             |  |
|                                                        | Higher BMI (per 5 kg/m <sup>2</sup> increase)          | 0.99 (0.86-1.15)                                                                       | 0.90              | 0.94 (0.78-1.14)  | 0.54                                                                                      |         |             |  |
|                                                        | Lower eGFR (per 10 ml/min/1.73m <sup>2</sup> decrease) | 1.24 (1.12-1.37)                                                                       | <0.0001           | 1.31 (1.13-1.54)  | 0.001                                                                                     |         |             |  |
|                                                        | <i>(with stages of AKI)</i>                            | Higher urine PCR (g/g)(per doubling)                                                   | 1.77 (1.57- 2.00) | < 0.0001          | 0.859                                                                                     | N/A     |             |  |
|                                                        |                                                        | Female vs Male                                                                         | 1.26 (0.81-1.95)  | 0.31              |                                                                                           |         |             |  |
|                                                        |                                                        | Black vs Non-Black                                                                     | 0.96 (0.57-1.62)  | 0.87              |                                                                                           |         |             |  |
|                                                        |                                                        | Hispanic vs Non-Hispanic                                                               | 0.70 (0.21-2.30)  | 0.56              |                                                                                           |         |             |  |
|                                                        |                                                        | Diabetic vs Non-Diabetic                                                               | 1.70 (1.00-2.90)  | 0.05              |                                                                                           |         |             |  |
|                                                        |                                                        | Older Age (per 5 yr increase)                                                          | 0.92 (0.83-1.01)  | 0.09              |                                                                                           |         |             |  |
|                                                        |                                                        | Higher Systolic BP (per 10 mmHg increase)                                              | 1.01 (0.92-1.12)  | 0.78              |                                                                                           |         |             |  |
|                                                        |                                                        | Higher BMI (per 5 kg/m <sup>2</sup> increase)                                          | 0.99 (0.86-1.15)  | 0.93              |                                                                                           |         |             |  |
| Lower eGFR (per 10 ml/min/1.73m <sup>2</sup> decrease) |                                                        | 1.24 (1.12-1.37)                                                                       | < 0.0001          |                   |                                                                                           |         |             |  |
| Stage 2 vs. stage 1 AKI                                |                                                        | 0.92 (0.47-1.79)                                                                       | 0.81              |                   |                                                                                           |         |             |  |
| Stage 3 vs. stage 1 AKI                                | 2.17 (1.26-3.74)                                       | 0.005                                                                                  |                   |                   |                                                                                           |         |             |  |

AKI, acute kidney injury; BMI, body mass index; BP, blood pressure; eGFR, estimated glomerular filtration rate; PCR, protein to creatinine ratio

**Supplementary Table 5. Urine PCR, AKI/stage of AKI and risk of kidney disease progression among all ASSESS-AKI adult match cohort study participants (N=1538)**

|                                                        | Predictor(s) in model                                                   | All ASSESS-AKI enrollees (N=1538)                        |                               |             |
|--------------------------------------------------------|-------------------------------------------------------------------------|----------------------------------------------------------|-------------------------------|-------------|
|                                                        |                                                                         | HR                                                       | P-value                       | C-statistic |
| Unadjusted models                                      | Higher urine PCR (g/g)(per doubling)                                    | 2.09 (1.91-2.28)                                         | < 0.0001                      | 0.815       |
|                                                        | Lower eGFR (per 10 ml/min/1.73m <sup>2</sup> decrease)                  | 1.55 (1.42-1.70)                                         | <0.0001                       | 0.758       |
|                                                        | AKI vs Non-AKI                                                          | 3.06 (2.11-4.44)                                         | < 0.0001                      | 0.387       |
|                                                        | AKI Stage 1 vs no AKI<br>AKI Stage 2 vs no AKI<br>AKI Stage 3 vs no AKI | 2.89 (1.94-4.29)<br>2.57 (1.27-5.19)<br>4.92 (2.66-9.10) | < 0.0001<br>0.009<br>< 0.0001 | 0.477       |
| Adjusted models (with interaction terms)               | Higher urine PCR (g/g)(per doubling)                                    | 1.96 (1.68- 2.28)                                        | < 0.0001                      | 0.840       |
|                                                        | Female vs Male                                                          | 1.35 (0.85-2.16)                                         | 0.20                          |             |
|                                                        | Black vs Non-Black                                                      | 1.33 (0.76-2.31)                                         | 0.32                          |             |
|                                                        | Hispanic vs Non-Hispanic                                                | 0.98 (0.26-3.66)                                         | 0.98                          |             |
|                                                        | Diabetic vs Non-Diabetic                                                | 2.10 (1.23-3.59)                                         | 0.007                         |             |
|                                                        | Older Age (per 5 yr increase)                                           | 0.94 (0.84-1.06)                                         | 0.32                          |             |
|                                                        | Higher Systolic BP (per 10 mmHg increase)                               | 1.09 (0.97-1.21)                                         | 0.13                          |             |
|                                                        | Higher BMI (per 5 kg/m <sup>2</sup> increase)                           | 1.06 (0.92-1.23)                                         | 0.43                          |             |
| Lower eGFR (per 10 ml/min/1.73m <sup>2</sup> decrease) | 1.11 (1.00-1.23)                                                        | 0.05                                                     |                               |             |
| AKI vs. no AKI                                         | AKI vs. no AKI                                                          | 2.53 (1.21-5.25)                                         | 0.01                          |             |
|                                                        | AKI vs. no AKI*urine PCR                                                | 0.96 (0.88-1.05)                                         | 0.34                          |             |

|                                 |                                                        |                   |          |       |
|---------------------------------|--------------------------------------------------------|-------------------|----------|-------|
| <i>Stages of AKI vs. no AKI</i> | Higher urine PCR (g/m)(per doubling)                   | 2.03 (1.66- 2.49) | < 0.0001 | 0.845 |
|                                 | Female vs Male                                         | 1.45 (0.90-2.31)  | 0.12     |       |
|                                 | Black vs Non-Black                                     | 1.29 (0.74-2.25)  | 0.38     |       |
|                                 | Hispanic vs Non-Hispanic                               | 0.95 (0.25-3.53)  | 0.94     |       |
|                                 | Diabetic vs Non-Diabetic                               | 2.08 (1.21-3.56)  | 0.008    |       |
|                                 | Older Age (per 5 yr increase)                          | 0.95 (0.85-1.07)  | 0.39     |       |
|                                 | Higher Systolic BP (per 10 mmHg increase)              | 1.09 (0.98-1.22)  | 0.12     |       |
|                                 | Higher BMI (per 5 kg/m <sup>2</sup> increase)          | 1.05 (0.91-1.22)  | 0.51     |       |
|                                 | Lower eGFR (per 10 ml/min/1.73m <sup>2</sup> decrease) | 1.11 (1.00-1.23)  | 0.05     |       |
|                                 | AKI Stage 1 vs no AKI                                  | 1.57 (0.91-2.72)  | 0.11     |       |
|                                 | AKI Stage 2 vs no AKI                                  | 1.67 (0.65-4.31)  | 0.29     |       |
| AKI Stage 3 vs no AKI           | 3.42 (1.28-9.12)                                       | 0.01              |          |       |
| AKI Stage 1 vs no AKI*urine PCR | 0.90 (0.71-1.15)                                       | 0.39              |          |       |
| AKI Stage 2 vs no AKI*urine PCR | 0.96 (0.64-1.43)                                       | 0.84              |          |       |
| AKI Stage 3 vs no AKI*urine PCR | 0.88 (0.56-1.36)                                       | 0.56              |          |       |

AKI, acute kidney injury; BMI, body mass index; BP, blood pressure; eGFR, estimated glomerular filtration rate; PCR, protein to creatinine ratio

**Supplementary Table 6. Kidney Failure Risk Equation (KFRE) score, AKI/stages of AKI and risk ESRD**

|                                             | ASSESS-AKI enrollees <u>with</u> AKI three months prior to baseline visit (N=769)                        |                     |             | ASSESS-AKI enrollees <u>without</u> AKI three months prior to baseline visit (N=769) |                     |             | All matched ASSESS-AKI enrollees (N=1538) |                                                                               |                                   |       |
|---------------------------------------------|----------------------------------------------------------------------------------------------------------|---------------------|-------------|--------------------------------------------------------------------------------------|---------------------|-------------|-------------------------------------------|-------------------------------------------------------------------------------|-----------------------------------|-------|
|                                             | HR                                                                                                       | P-value             | C-statistic | HR                                                                                   | P-value             | C-statistic | HR                                        | P-value                                                                       | C-statistic                       |       |
| Unadjusted models                           | KFRE score (per 0.1 increase)                                                                            | 2.02<br>(1.83-2.23) | <0.0001     | 0.943                                                                                | 3.71<br>(2.39-5.76) | <0.0001     | 0.883                                     | 2.94 (2.50-3.46)                                                              | <0.0001                           | 0.936 |
|                                             | AKI vs Non-AKI                                                                                           | N/A                 |             |                                                                                      | N/A                 |             |                                           | 4.38 (2.32-8.29)                                                              | <0.0001                           | 0.417 |
|                                             | AKI Stage 1 vs no AKI<br>AKI Stage 2 vs no AKI<br>AKI Stage 3 vs no AKI                                  | N/A                 |             |                                                                                      | N/A                 |             |                                           | 4.39 (2.27-8.51)<br>3.31 (1.14-9.60)<br>5.76 (2.21-14.99)                     | <0.0001<br>0.03<br>0.0003         | 0.514 |
| Adjusted models<br>(with interaction terms) | KFRE score (per 0.1 increase)<br>AKI vs no AKI                                                           | N/A                 |             |                                                                                      | N/A                 |             |                                           | 2.79 (2.37-3.30)<br>2.80 (1.41-5.55)                                          | <0.0001<br>0.003                  | 0.909 |
|                                             | KFRE score (per 0.1 increase)<br>AKI vs no AKI                                                           | N/A                 |             |                                                                                      | N/A                 |             |                                           | 3.85 (2.69-5.50)<br>3.66 (1.70-7.91)                                          | <0.0001<br>0.0009                 | 0.909 |
|                                             | AKI vs no AKI*KFRE                                                                                       | N/A                 |             |                                                                                      | N/A                 |             |                                           | 0.69 (0.47-1.00)                                                              | 0.05                              |       |
|                                             | KFRE score (per 0.1 increase)<br>AKI Stage 1 vs no AKI<br>AKI Stage 2 vs no AKI<br>AKI Stage 3 vs no AKI | N/A                 |             |                                                                                      | N/A                 |             |                                           | 2.87 (2.42-3.40)<br>2.58 (1.25-5.33)<br>1.77 (0.51-6.12)<br>6.00 (2.21-16.31) | <0.0001<br>0.01<br>0.36<br>0.0004 | 0.896 |



|  |                               |     |     |                   |         |       |
|--|-------------------------------|-----|-----|-------------------|---------|-------|
|  | KFRE score (per 0.1 increase) |     |     | 3.94 (2.73-5.70)  | <0.0001 | 0.898 |
|  | AKI Stage 1 vs no AKI         |     |     | 3.51 (1.56-7.89)  | 0.002   |       |
|  | AKI Stage 2 vs no AKI         |     |     | 3.02 (0.80-11.37) | 0.10    |       |
|  | AKI Stage 3 vs no AKI         |     |     | 4.59 (1.35-15.61) | 0.01    |       |
|  |                               | N/A | N/A |                   |         |       |
|  | AKI Stage 1 vs no AKI*KFRE    |     |     | 0.68 (0.46-1.01)  | 0.06    |       |
|  | AKI Stage 2 vs no AKI*KFRE    |     |     | 0.60 (0.36-1.03)  | 0.06    |       |
|  | AKI Stage 3 vs no AKI*KFRE    |     |     | 1.61 (0.71-3.69)  | 0.26    |       |
